# Supplementary material
Source: Springer Nature journal article supplement (https://www.springermedizin.de/resource/supplementary/13012_2013_773_MOESM3_ESM.pdf/9630658)
Supplement: MOESM3 [file 9630658]

# Project HEAL

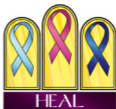

*Health through Early Awareness and Learning*

Workshop 3

Colorectal Cancer

Review

Local Resources
